# Supplementary material for: Superior electrochemical properties of MoS2 powders with a MoS2@void@MoS2 configuration
Source: Royal Society of Chemistry journal article supplement (doi:10.1039/c4nr00064a), 2014-01-01
Supplement: c4nr00064a1.pdf [file c4nr00064a1.pdf]

## Supporting Information

### Superior electrochemical properties of MoS<sub>2</sub> powders with MoS<sub>2</sub>@void@MoS<sub>2</sub> configuration

You Na Ko,<sup>a,b</sup> Yun Chan Kang<sup>\*a</sup> and Seung Bin Park<sup>b</sup>

<sup>a</sup>Department of Chemical Engineering, Konkuk University, 1 Hwayang-dong, Gwangjin-gu, Seoul 143-701, Korea; E-mail: yckang@konkuk.ac.kr

<sup>b</sup>Department of Chemical and Biomolecular Engineering, Korea Advanced Institute of Science and Technology, 291 Daehak-ro, Yuseong-gu, Daejeon 305-701, Korea

## **EXPERIMENTAL DETAILS**

### **Synthesis of yolk-shell and dense structured MoS<sub>2</sub> powders**

Yolk-shell MoO<sub>3</sub> powders were synthesized by applying an ultrasonic spray pyrolysis process. The schematic illustration of the formation process of yolk-shell MoS<sub>2</sub> powders is shown in Figures S1. As the first step, MoO<sub>x</sub>-carbon composite powders were synthesized by ultrasonic spray pyrolysis. Subsequently, yolk-shell MoO<sub>3</sub> powders were obtained by combustion of the prepared MoO<sub>x</sub>-carbon composite powders in air at 400 °C for 1 h. The resultant yolk-shell MoO<sub>3</sub> powders were sulfidated at 400 °C for 6 h in the presence of 10% H<sub>2</sub>/Ar mixture gas with thiourea as a sulfur source. A small alumina boat containing the yolk-shell MoO<sub>3</sub> powders was loaded into a larger alumina boat with a cover. An excess amount of thiourea powder was loaded on the outside of the small alumina boat for complete sulfidation of the yolk-shell powders. Decomposition of the melted thiourea under hydrogen/argon mixture gas supplied as the carrier gas produced hydrogen sulfide gas. MoS<sub>2</sub> powder was formed by sulfidation of the yolk-shell MoO<sub>3</sub> powders by the continuously generated hydrogen sulfide gas. The MoS<sub>2</sub> powders with dense structure were also prepared by the similar preparation process. The bare MoO<sub>3</sub> powders with dense structure obtained by spray pyrolysis at 600 °C from the spray solution without carbon source material transformed into the MoS<sub>2</sub> powders with dense structure after sulfidation process.

### **Characterizations**

The morphology of the prepared samples was evaluated via scanning electron microscopy (SEM, JEOL JSM-6060), field emission scanning electron microscopy (FE-SEM, Hitachi S-4800), and transmission electron microscopy (TEM, JEOL-2100F). The crystal structures of the samples were investigated using an X-ray diffractometer (XRD, X'Pert PRO MPD) with Cu K $\alpha$  radiation ( $\lambda = 1.5418 \text{ \AA}$ ). The XPS spectra of the rattle-type MoS<sub>2</sub> microspheres was

investigated using X-ray photoelectron spectroscopy (XPS, Theta Probe AR-XPS System) with Al K $\alpha$  radiation (1486.6 eV). The binding energy was calibrated with reference to the C 1s level of carbon (284.6 eV).

### **Electrochemical measurements**

The electrochemical properties of the MoS<sub>2</sub> powders were analyzed by constructing a 2032-type coin cell. The anode was prepared by mixing the active material, carbon black, and sodium carboxymethyl cellulose (CMC) in a weight ratio of 7:2:1. Li metal and microporous polypropylene film were used as the counter electrode and the separator, respectively. The electrolyte was 1 M LiPF<sub>6</sub> dissolved in a mixture of ethylene carbonate/dimethyl carbonate (EC/DMC; 1:1 v/v). The discharge/charge characteristics of the samples were investigated by cycling in the 0.001–3 V potential range at various current densities. Cyclic voltammograms were measured at a scan rate of 0.1 mV s<sup>-1</sup>.

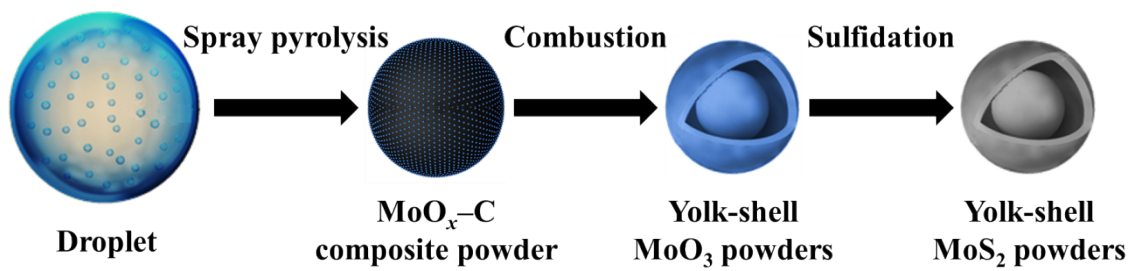

**Figure S1.** Schematic diagram of the formation process of yolk-shell MoS<sub>2</sub> powders.

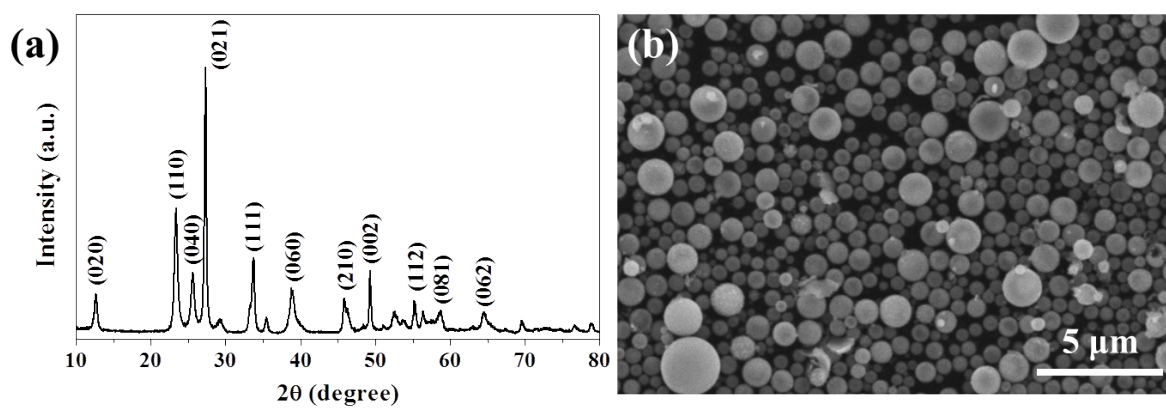

**Figure S2.** (a) XRD pattern and (b) SEM image of the yolk-shell  $\text{MoO}_3$  precursor powders.

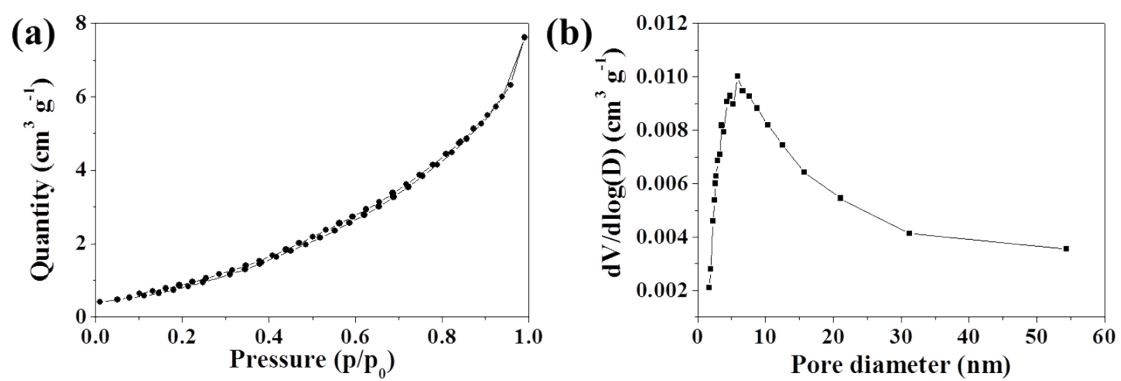

**Figure S3.** (a) Nitrogen adsorption-desorption isotherm plot and (b) pore size distribution curve of the yolk-shell  $\text{MoS}_2$  powders.

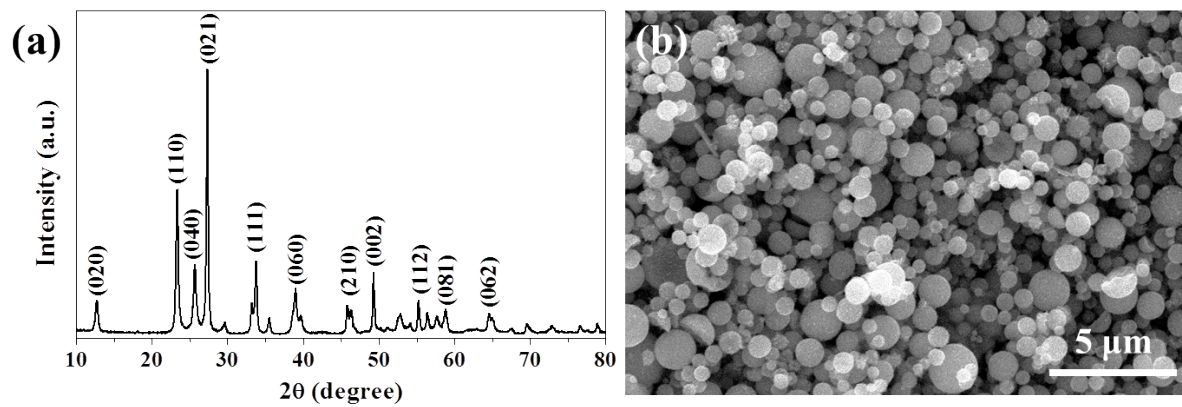

**Figure S4.** (a) XRD pattern and (b) SEM image of the dense  $\text{MoO}_3$  precursor powders.

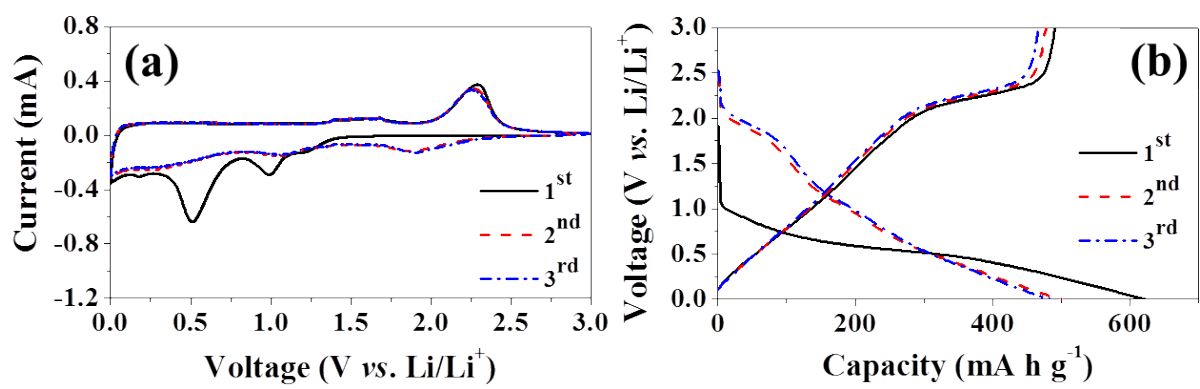

**Figure S5.** Electrochemical properties of the dense MoS<sub>2</sub> powders: (a) CVs and (b) discharge/charge voltage profiles.



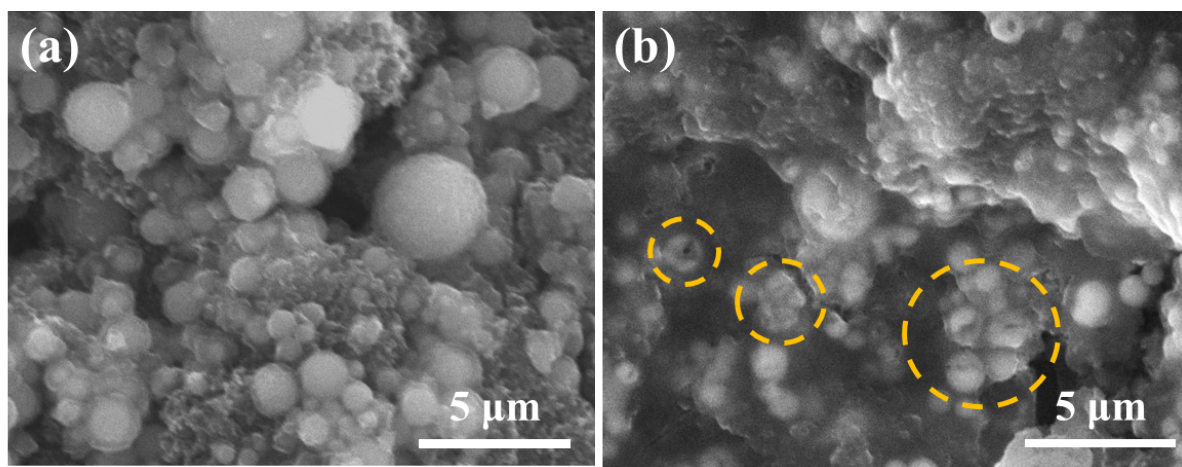

**Figure S6.** SEM images of the (a) yolk-shell and (b) dense MoS<sub>2</sub> powders after 100 cycles.

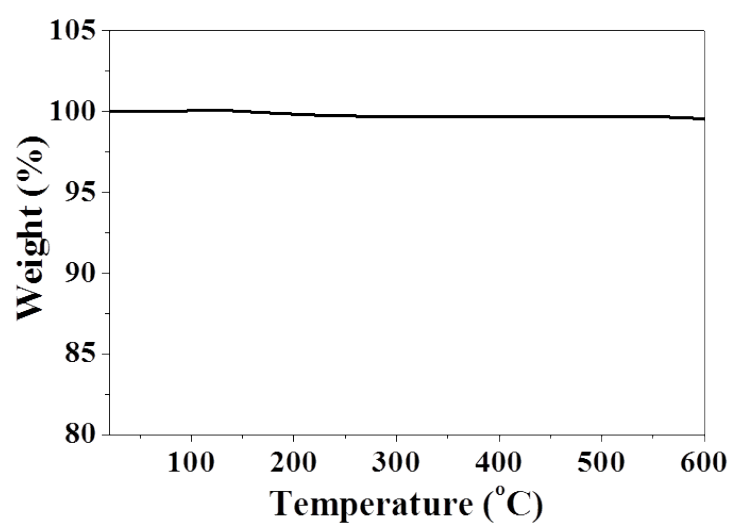

**Figure S7.** TG curve of the yolk-shell MoO<sub>3</sub> powders used as the precursor powders for MoS<sub>2</sub>.
